# Supplementary material
Source: PubMed Central journal article supplement (PMC9257956)
Supplement: NIHMS1812078-supplement-Supplemental_Figure_1__Flow_Diagram.pdf [file NIHMS1812078-supplement-Supplemental_Figure_1__Flow_Diagram.pdf]

### Supplemental Figure 1: Study Flow Diagram

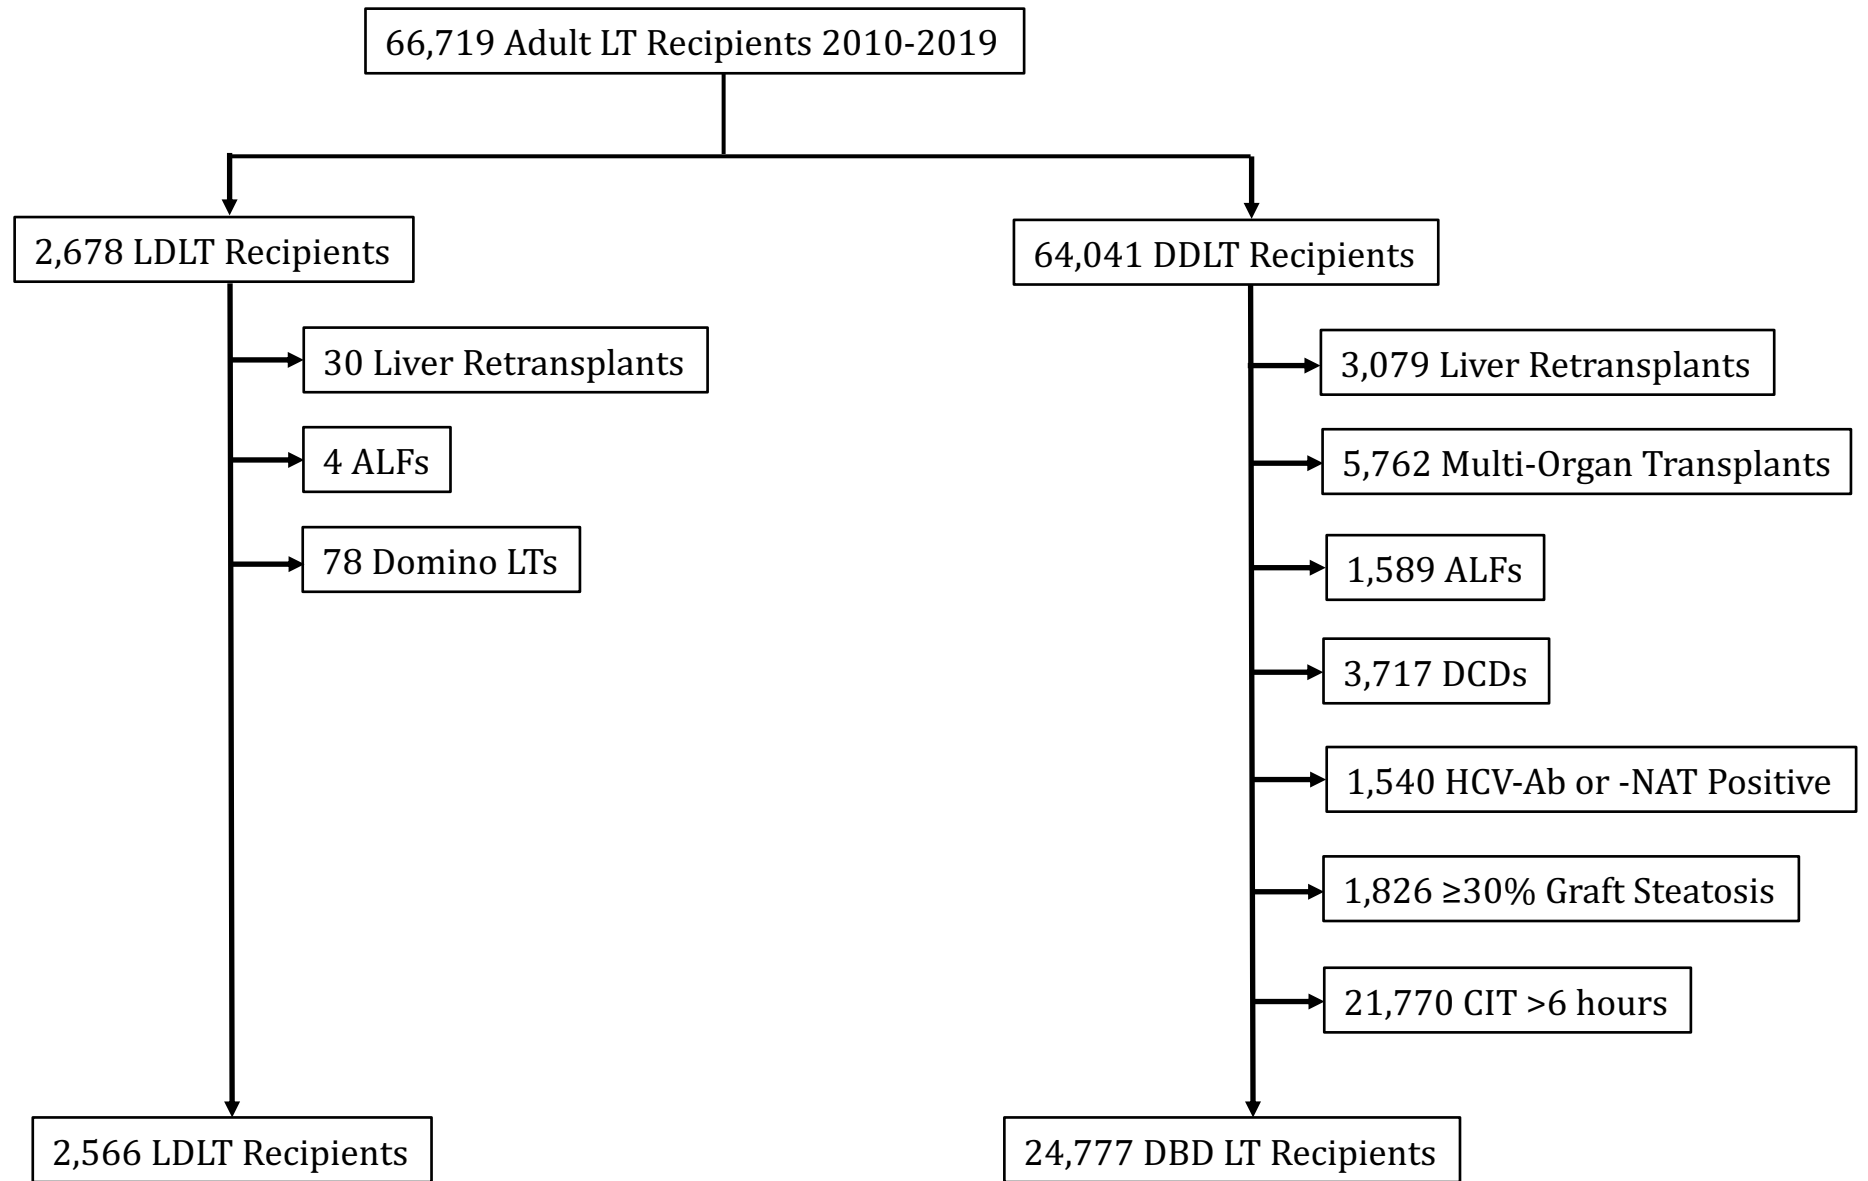

Ab, antibody; ALFs, acute liver failures; CIT, cold ischemic time; DBD, donation after brain death; DCD, donation after circulatory death; HCV, hepatitis C virus; LT, liver transplant; LDLT, living-donor liver transplant; NAT, nucleic acid testing.
