# Supplementary material
Source: PubMed Central journal article supplement (PMC9257956)

# Covariate Balancing via Propensity-Score Matching

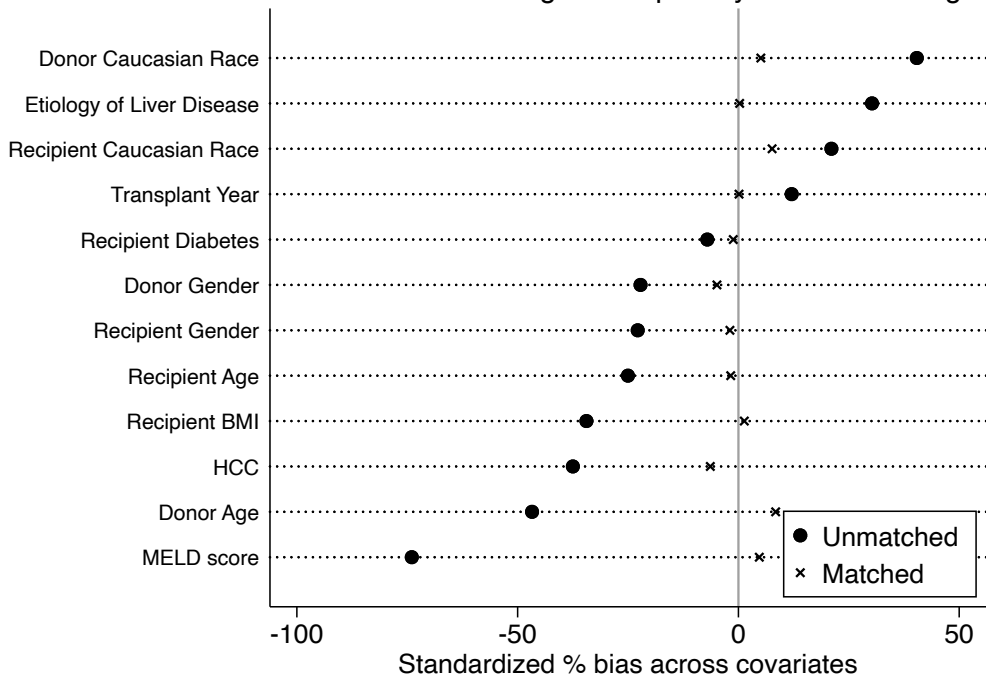

Supplement: NIHMS1812078-supplement-Supplemental_Figure_2_Covariate_Balancing.pdf [file NIHMS1812078-supplement-Supplemental_Figure_2_Covariate_Balancing.pdf]
